# Supplementary material for: Utility of Computed Tomography versus Abdominal Ultrasound Examination to Identify Iliosacral Lymphadenomegaly in Dogs with Apocrine Gland Adenocarcinoma of the Anal Sac
Source: PubMed Central journal article supplement — J Vet Intern Med. 2016 Oct 24;30(6):1858–63. doi: 10.1111/jvim.14601 (PMC5115187; doi:10.1111/jvim.14601), 2016-10-24
Supplement: JVIM-30-1858-s001.pdf [file JVIM-30-1858-s001.pdf]

**Supporting Table 1.** Maximum Diameters and Normalized Values for the Largest Medial Iliac, Internal Iliac and Sacral Lymph Nodes of Each Patient in Cohort A as Measured on CT

| Patient number | Largest MILN (mm) | Normalized Ratio | Largest IILN (mm) | Normalized ratio | Largest SLN (mm) | Normalized ratio |
|----------------|-------------------|------------------|-------------------|------------------|------------------|------------------|
| 1              | 3.5               | 0.8              | -                 | -                | -                | -                |
| 2              | 4.1               | 0.7              | -                 | -                | -                | -                |
| 3              | 7.5               | 0.8              | 6.5               | 0.7              | 3.1              | 0.3              |
| 4              | 6.7               | 0.8              | -                 | -                | 5.7              | 0.7              |
| 5              | 9.3               | 0.9              | 3.9               | 0.4              | -                | -                |
| 6              | 10.3              | 1.2              | 5.7               | 0.7              | -                | -                |
| 7              | 6.5               | 0.9              | -                 | -                | -                | -                |
| 8              | 9.3               | 1.1              | 5.7               | 0.7              | 8.1              | 0.9              |
| 9              | 3.6               | 0.6              | -                 | -                | 2.8              | 0.5              |
| 10             | 5.7               | 0.9              | 2.7               | 0.4              | -                | -                |
| 11             | 9.4               | 1.3              | 4.2               | 0.6              | 5.5              | 0.7              |
| 12             | 5.7               | 0.8              | 5.7               | 0.8              | 6.4              | 0.9              |
| 13             | 10.5              | 1.0              | 5.0               | 0.5              | -                | -                |
| 14             | 10.5              | 0.9              | 6.8               | 0.6              | -                | -                |
| 15             | 8.0               | 0.6              | 5.3               | 0.4              | 8.6              | 0.6              |
| 16             | 2.7               | 0.4              | 3.4               | 0.5              | -                | -                |
| 17             | 7.0               | 0.6              | 10.4              | 0.9              | 5.6              | 0.5              |
| 18             | 9.2               | 0.8              | 6.8               | 0.6              | 8.2              | 0.7              |
| 19             | 6.0               | 0.8              | 4.7               | 0.6              | 6.6              | 0.9              |
| 20             | 12.5              | 1.2              | 7.0               | 0.7              | -                | -                |
| 21             | 7.0               | 0.7              | 4.6               | 0.5              | 4.3              | 0.5              |
| 22             | 3.6               | 1.0              | 2.4               | 0.7              | -                | -                |
| 23             | 5.5               | 1.2              | 3.3               | 0.7              | 2.4              | 0.5              |
| 24             | 7.3               | 0.9              | 3.7               | 0.4              | 2.7              | 0.3              |
| 25             | 13.0              | 1.2              | 10.5              | 1.0              | -                | -                |
| 26             | 3.6               | 0.7              | 3.4               | 0.6              | 1.6              | 0.3              |
| 27             | 8.1               | 1.1              | 7.4               | 1.0              | -                | -                |
| 28             | 5.5               | 0.9              | 2.9               | 0.5              | 0.9              | 0.2              |
| 29             | 10.0              | 1.1              | 8.4               | 0.9              | 4.7              | 0.5              |
| 30             | 10.2              | 0.9              | 7.5               | 0.7              | 4.6              | 0.4              |

MILN, medial iliac lymph node; IILN, internal iliac lymph node; SLN, sacral lymph node

**Supporting Table 2.** Maximum Diameters and Normalized Values for the Largest Medial Iliac, Internal Iliac and Sacral Lymph Nodes of Each Patient in Cohort B as Measured on CT.

| Patient number | Largest MILN (mm) | Normalized Ratio | Enlarged on AUS? | Largest IILN (mm) | Normalized ratio | Enlarged on AUS? | Largest SLN (mm) | Normalized ratio | Enlarged on AUS? |
|----------------|-------------------|------------------|------------------|-------------------|------------------|------------------|------------------|------------------|------------------|
| 1              | 12.0              | 1.2              | -                | 24.3              | 2.4*             | Yes              | 32.5             | 3.1*             | No               |
| 2              | 23.8              | 2.0*             | Yes              | 43.4              | 3.7*             | No               | 37.6             | 3.2*             | No               |
| 3              | 37.1              | 3.3*             | Yes              | 36.1              | 3.2*             | No               | 39.2             | 3.5*             | No               |
| 4              | 13.0              | 1.3*             | Yes              | 10.0              | 1.0*             | No               | 8.2              | 0.8              | -                |
| 5              | 14.9              | 1.3*             | Yes              | 20.3              | 1.8*             | Yes              | -                | -                | -                |
| 6              | -                 | -                | -                | 35.8              | 4.1*             | Yes              | -                | -                | -                |
| 7              | 26.1              | 2.5*             | Yes              | 33.5              | 3.3*             | No               | 32.8             | 3.2*             | No               |
| 8              | 7.7               | 0.5              | -                | 42.6              | 3.0*             | No               | 18.1             | 1.3*             | Yes              |
| 9              | 9.4               | 0.8              | -                | 4.7               | 0.4              | -                | 9.9              | 0.9              | -                |
| 10             | -                 | -                | -                | 29.9              | 4.1*             | No               | 22.3             | 3.1*             | Yes              |
| 11             | 9.0               | 1.0              | -                | 5.6               | 0.6              | -                | 6.5              | 0.7              | -                |
| 12             | -                 | -                | -                | -                 | -                | -                | 56.7             | 5.6*             | Yes              |
| 13             | 10.0              | 1.0              | -                | -                 | -                | -                | -                | -                | -                |
| 14             | 8.5               | 0.8              | -                | -                 | -                | -                | -                | -                | -                |
| 15             | 27.0              | 2.6*             | Yes              | 6.0               | 0.6              | -                | 5.4              | 0.5              | -                |
| 16             | 4.8               | 0.8              | -                | 5.6               | 0.9              | -                | -                | -                | -                |
| 17             | 12.8              | 1.4*             | No               | 23.4              | 2.5*             | Yes              | 18.2             | 1.9*             | Yes              |
| 18             | 9.3               | 0.7              | -                | 12.5              | 0.9              | -                | 10.8             | 0.8              | -                |
| 19             | 27.2              | 3.1*             | Yes              | 20.5              | 2.3*             | No               | 23.8             | 2.7*             | No               |
| 20             | 11.5              | 0.7              | -                | 5.9               | 0.4              | -                | 8.0              | 0.5              | -                |

The “\*” designates enlarged lymph nodes defined as LN:AO  $\geq$ 1.3 for medial iliac (MILN),  $\geq$ 1.0 for internal iliac (IILN), and  $\geq$ 1.0 for sacral (SLN).

The “-” symbol indicates that the lymph node was not detected and therefore the value was not calculated.
